# Supplementary material for: Preoperative Risk Stratification of Increased MIB-1 Labeling Index in Pituitary Adenoma: A Newly Proposed Prognostic Scoring System
Source: MDPI journal article supplement (doi:10.3390/jcm11237151), 2022-12-01
Supplement: s1 [file s1]

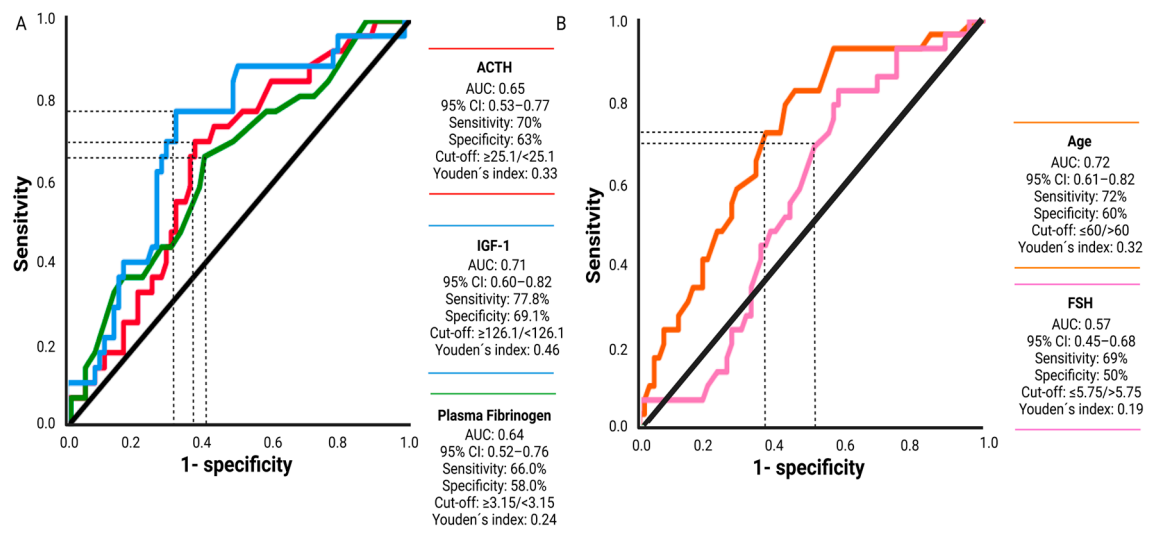

**Figure S1. (A)** Receiver-operating characteristic curve illustrating ACTH, IGF-1, and plasma fibrinogen in the positive correlation with increased MIB-1 labeling index ( $\geq 4\%$ ) **(B)** Receiver-operating characteristic curve illustrating age and FSH in the inverse correlation with increased MIB-1 labeling index ( $\geq 4\%$ ).
